# Supplementary material
Source: ML conference proceedings conference paper supplement (https://aclanthology.org/2023.ijcnlp-main.70)

**Input in Y**

такой п\*\*\*\*ж я читаю  
впервые!

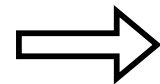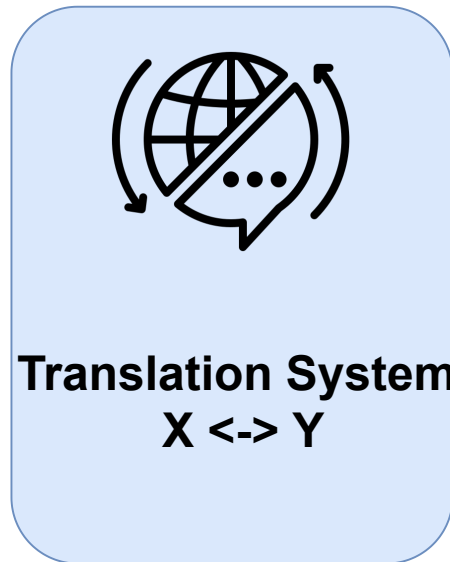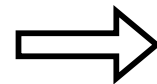

**Input in X**

This is the first time I read such  
a piece of s\*\*t

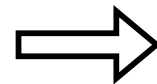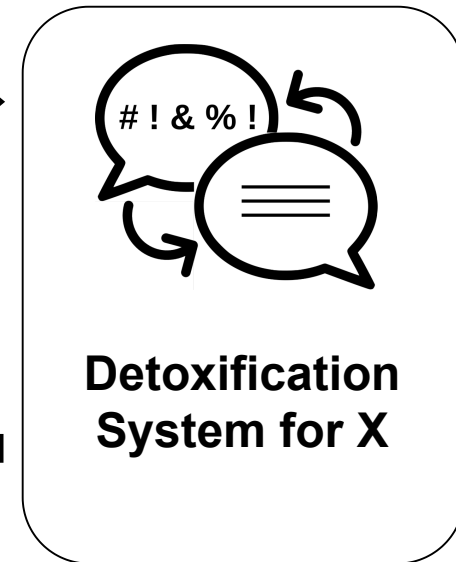

**Output in Y**

такое враньё я читаю  
впервые!

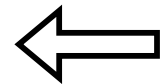

**Output in X**

This is the first time I read such  
a lie

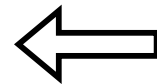

Supplement: Software [file Backtranslation.pdf › Cross-lingual Detox (new)-2/img/Backtranslation.pdf]
