# Supplementary material
Source: ML conference proceedings conference paper supplement (https://aclanthology.org/2023.ijcnlp-main.70)
Supplement: Software [file Multitask.pdf › Cross-lingual Detox (new)-2/img/Multitask.pdf]

## ParaDetox in X

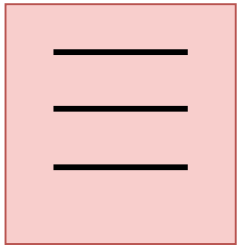

toxic

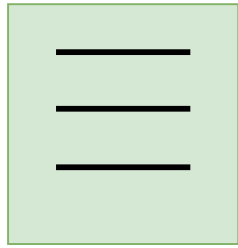

non-toxic

## Opus?

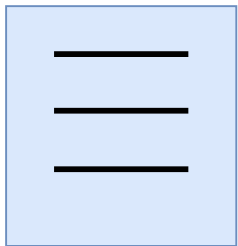

X

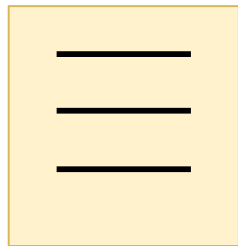

Y

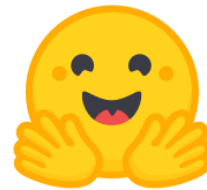

Multilingual  
LLM

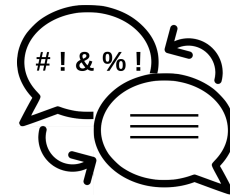

Detoxification  
System for X

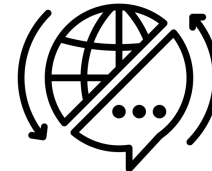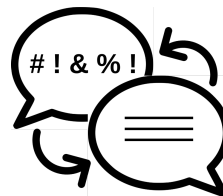

Detoxification  
System for X

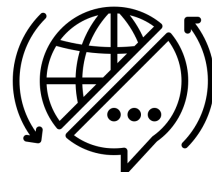

Output in Y

Детоксифицированный  
Русский текст

Какой-то токсичный  
текст на русском

Input in Y
