# Supplementary material
Source: ML conference proceedings conference paper supplement (https://aclanthology.org/2023.ijcnlp-main.70)

**Hidden representations**

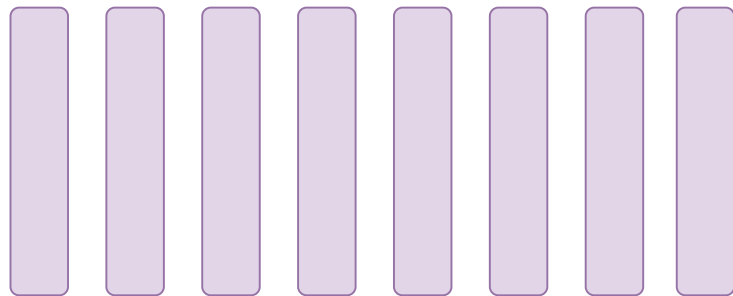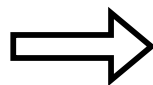

Vec2Vec  
Transformation

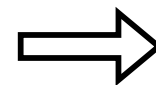

**New Hidden representations**

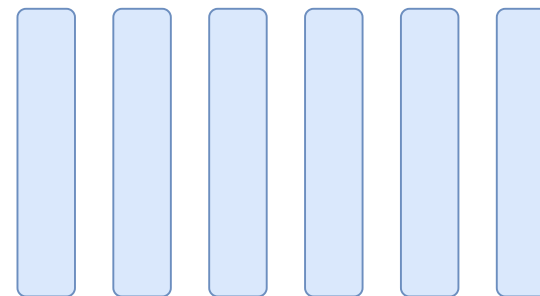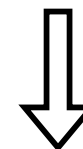

Decoder of   
Detoxification System for x

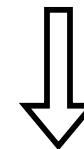

**Output in X**

Детоксифицированный  
текст на англ

Encoder of  
LLM for Y

**Input in Y**

Какой-то токсичный  
текст на русс

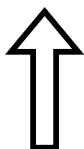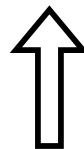

Supplement: Software [file Vec2Vec.pdf › Cross-lingual Detox (new)-2/img/Vec2Vec.pdf]
