# Supplementary material
Source: ML conference proceedings conference paper supplement (https://aclanthology.org/2023.ijcnlp-main.70)

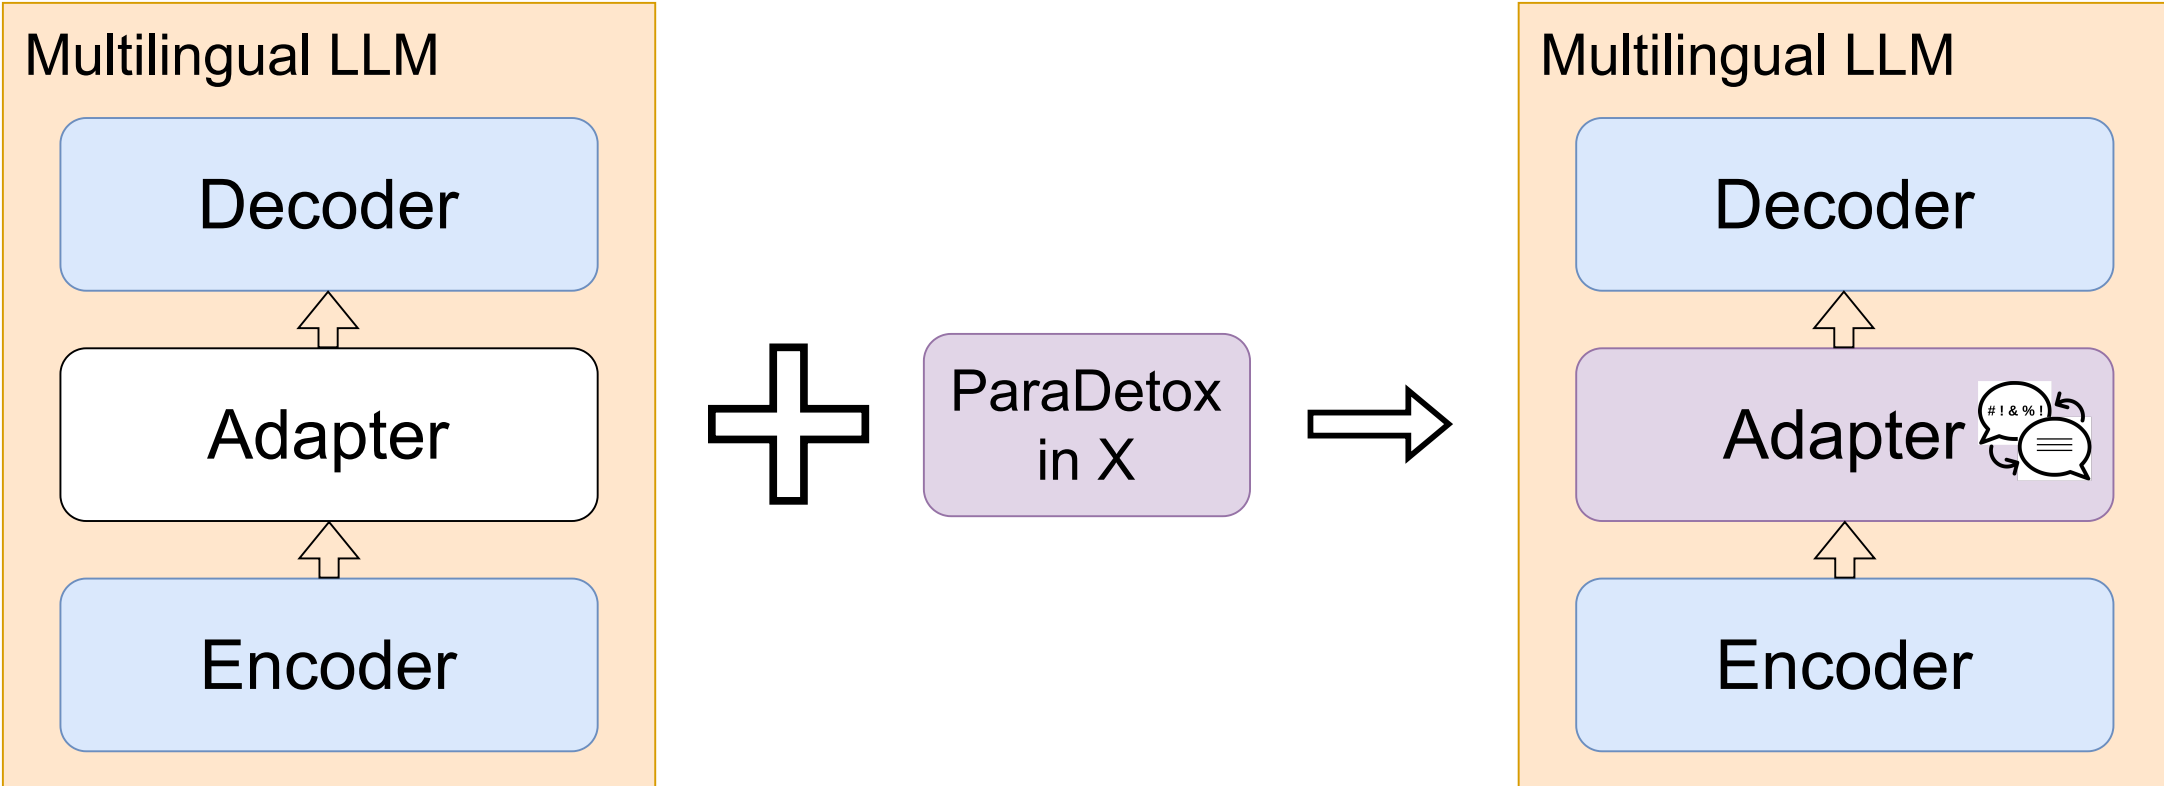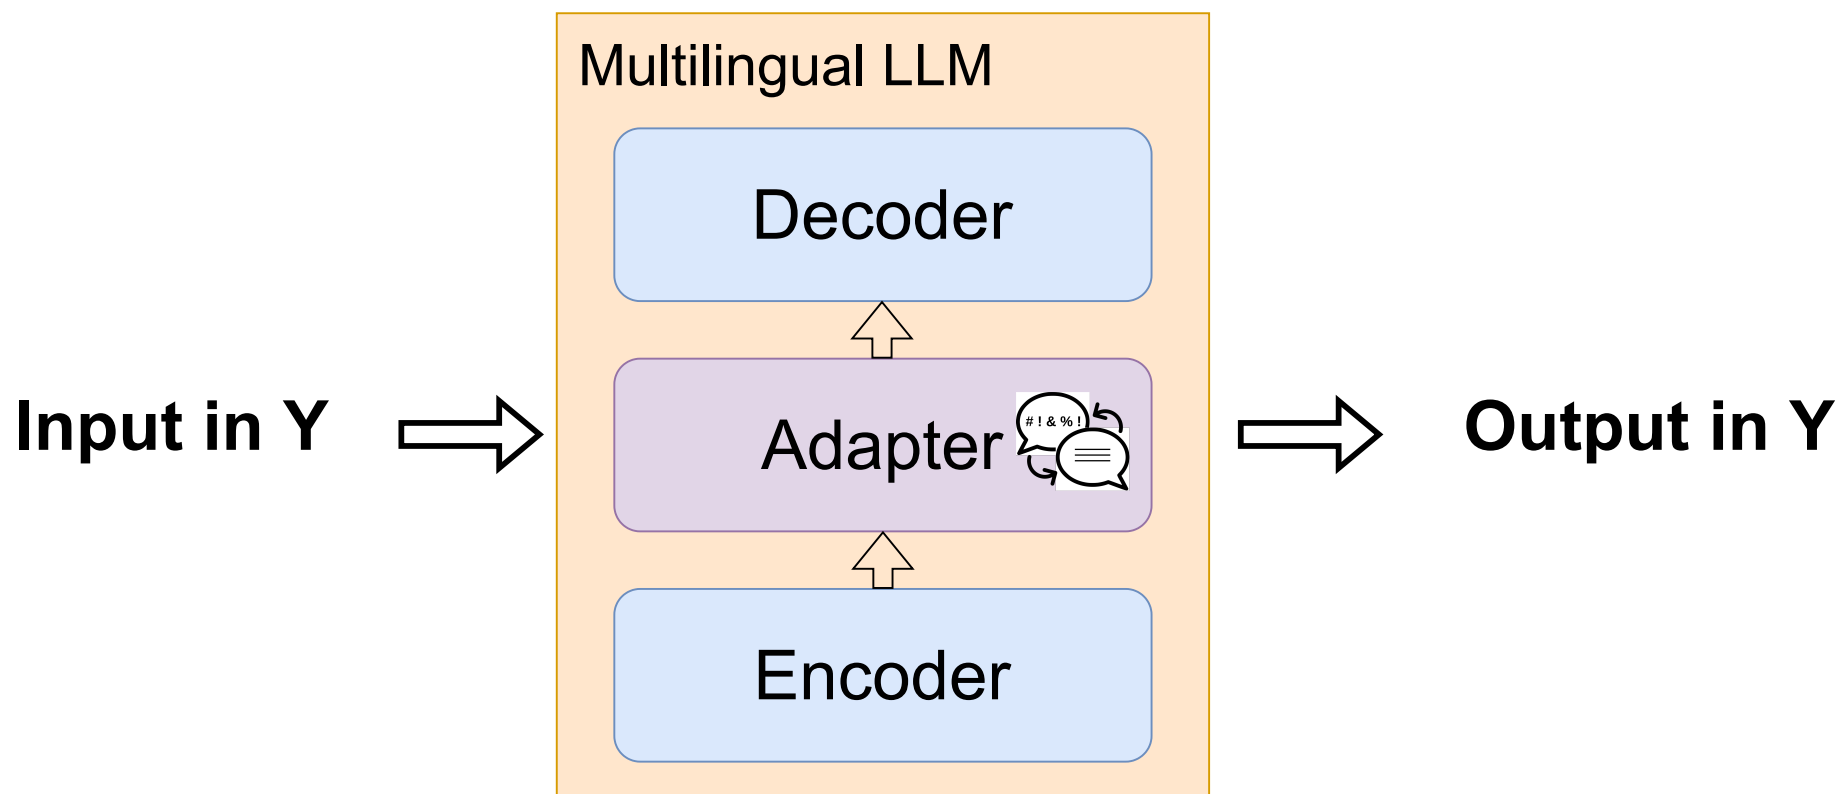

Supplement: Software [file Adapter.pdf › Cross-lingual Detox (new)-2/img/Adapter.pdf]

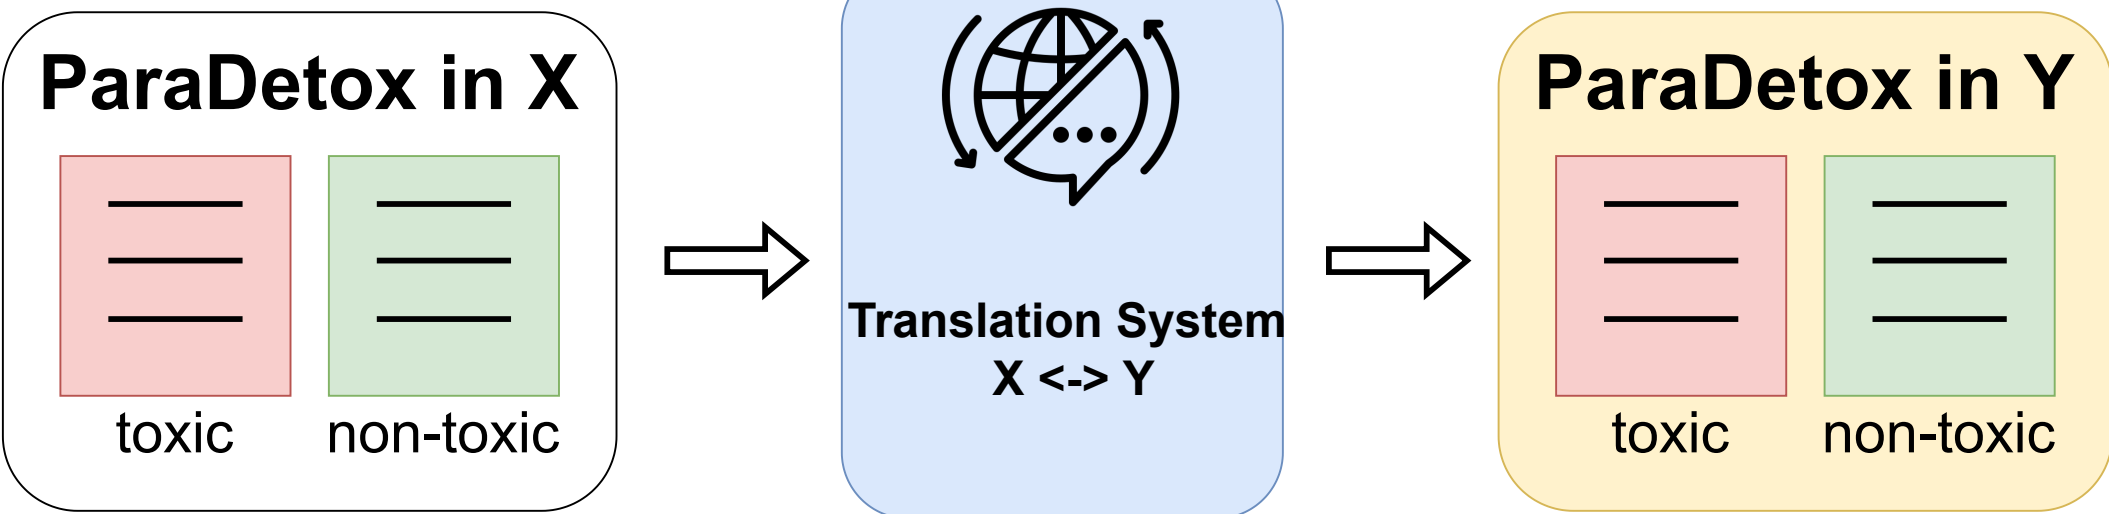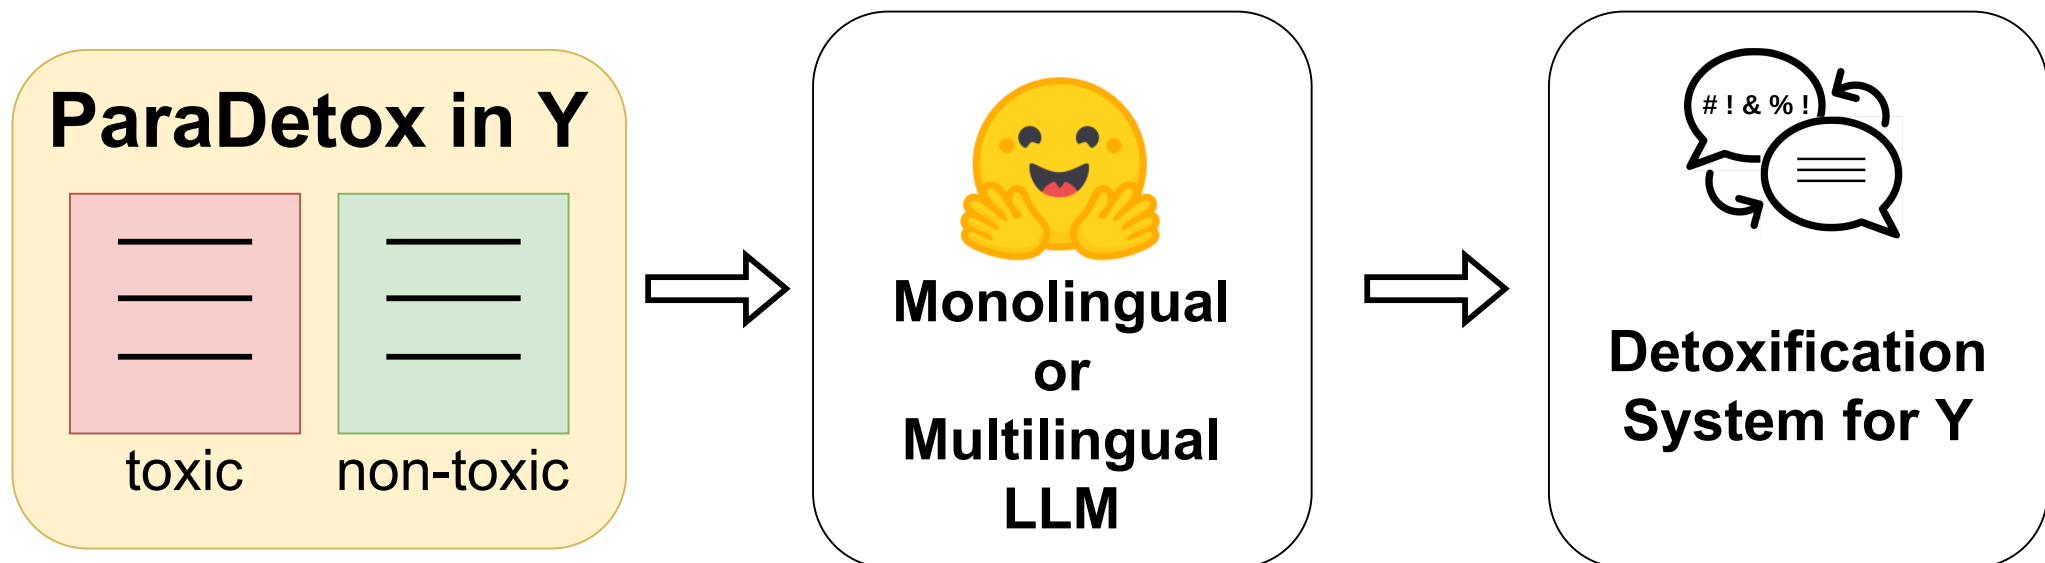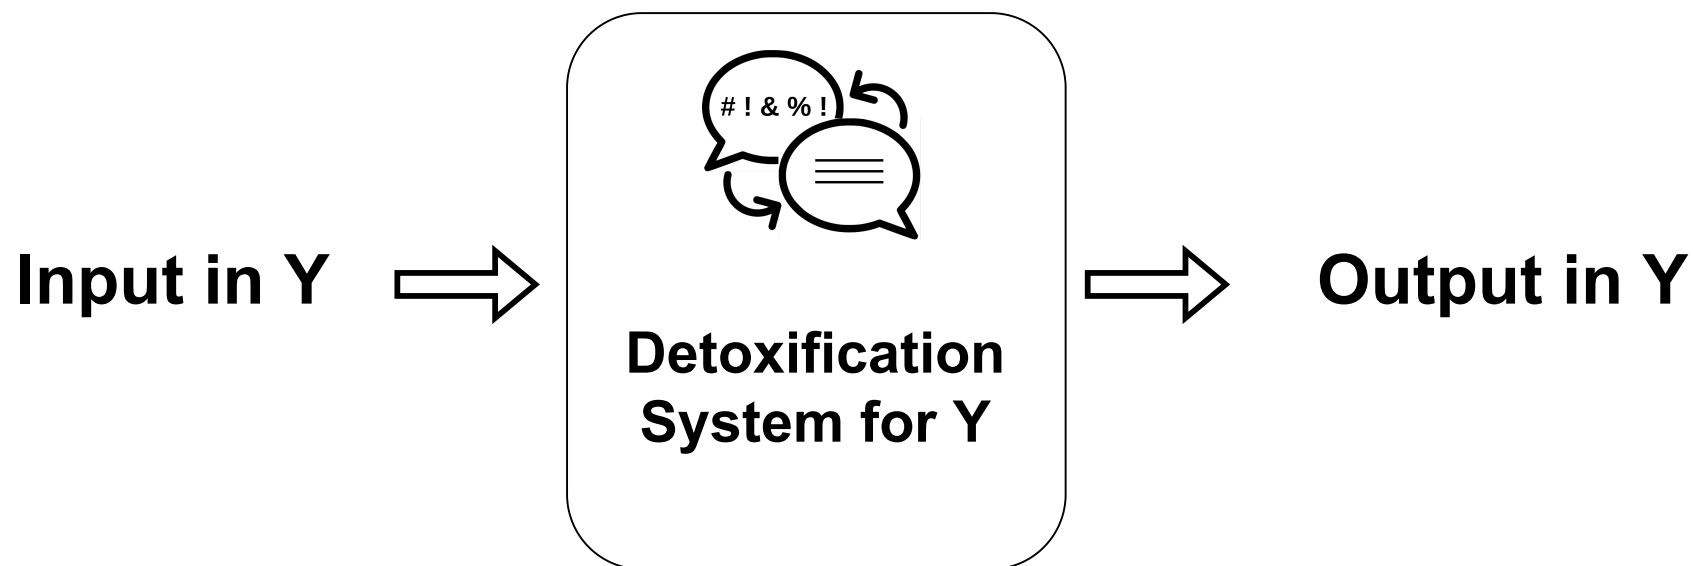

Supplement: Software [file Corpus_Translation.pdf › Cross-lingual Detox (new)-2/img/Corpus_Translation.pdf]

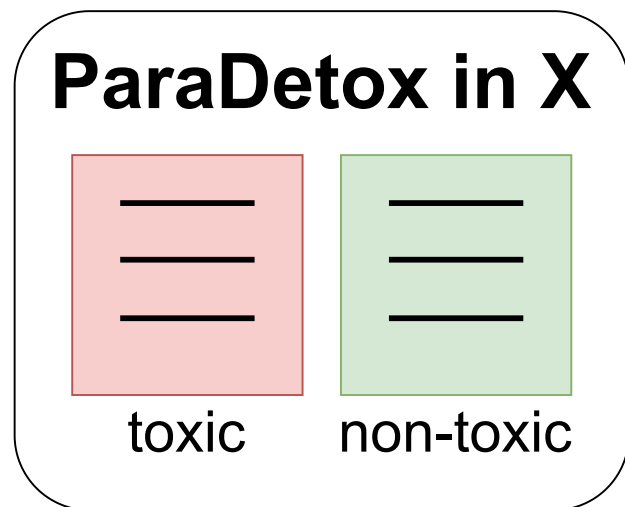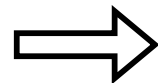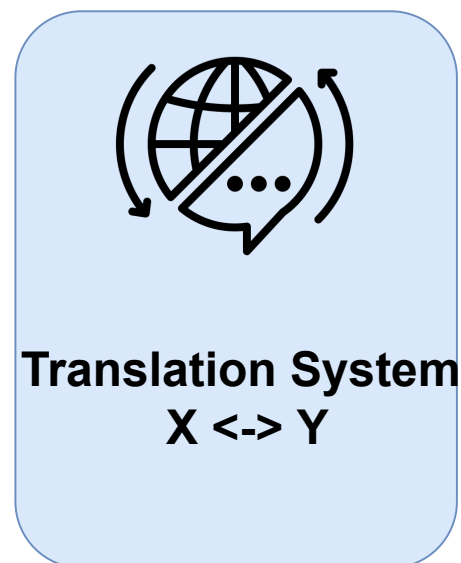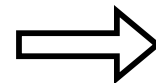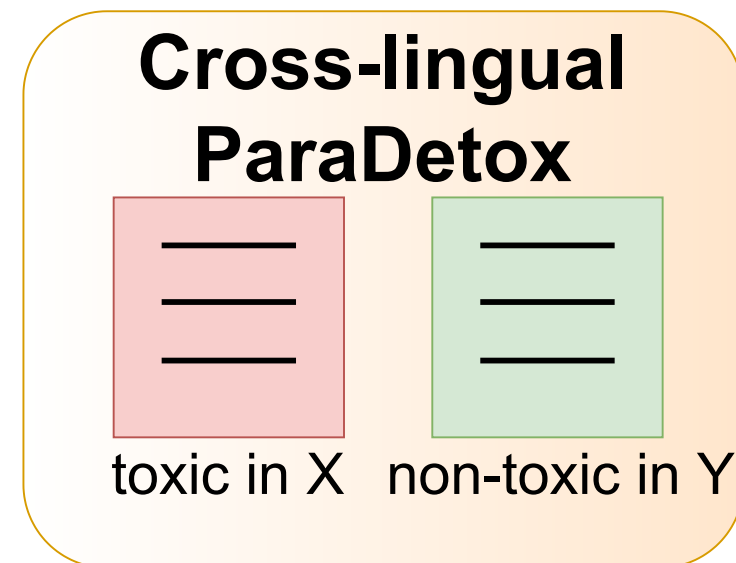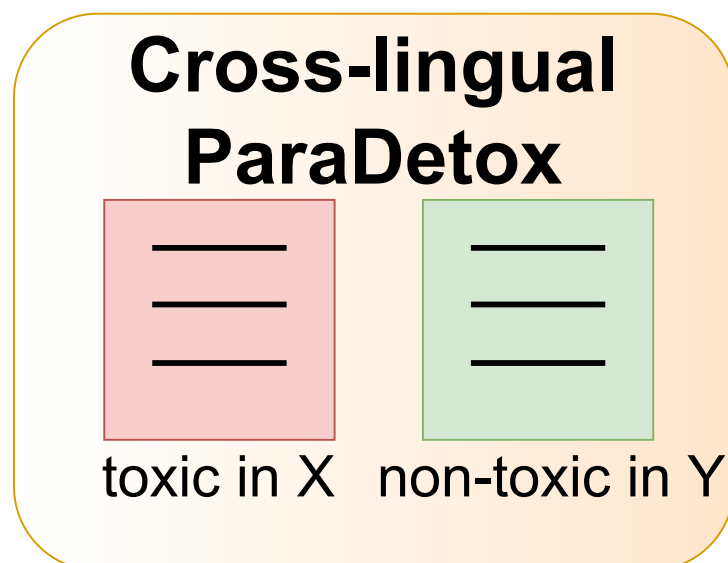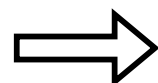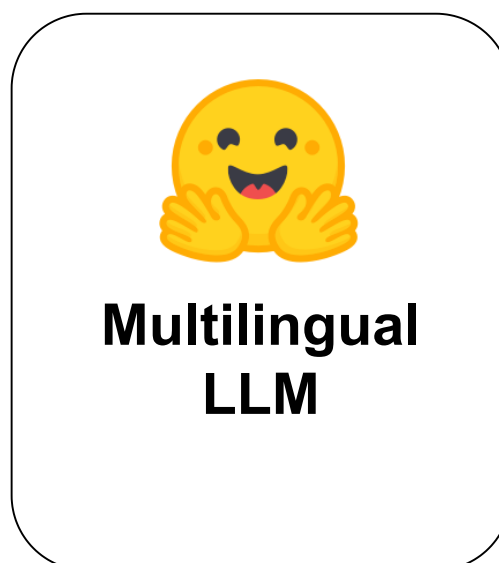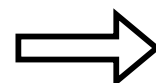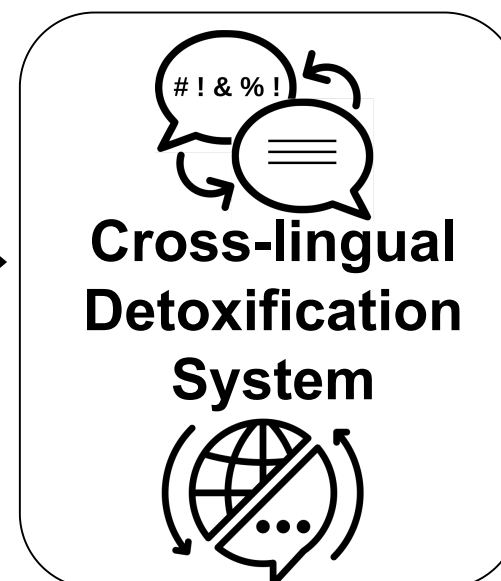

**Input in X**

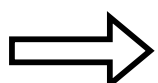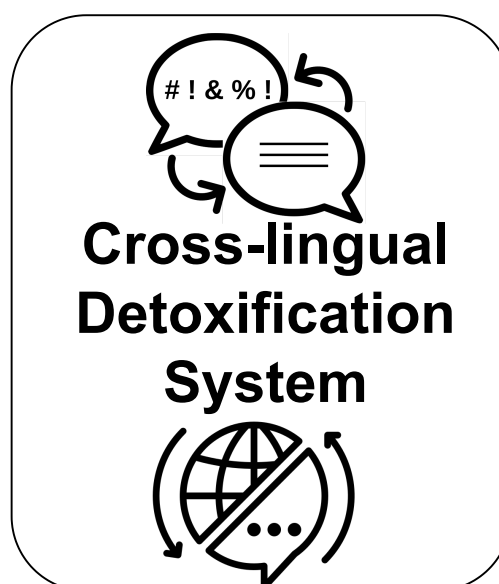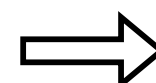

**Output in Y**

Supplement: Software [file Cross_lingual_Corpus.pdf › Cross-lingual Detox (new)-2/img/Cross_lingual_Corpus.pdf]
